# Supplementary material for: Sputtered PdO Decorated TiO2 Sensing Layer for a Hydrogen Gas Sensor
Source: Hindawi journal article supplement (doi:10.1155/2018/8678519), 2018-01-01
Supplement: f1 [file 8678519.f1.docx]

**Sputtered PdO-Doped TiO2 Sensing Layer for a Hydrogen Gas Sensor**

Jeong Hoon Lee,1 Seungmin Kwak,1,2 Jin-Hyung Lee,2 Inho Kim,3,4 Yong Kyoung Yoo,1 Kyu Hyoung Lee5

*1 Department of Electrical Engineering, Kwangwoon University, Seoul 01897, Republic of Korea*

*2 Korea Institute of Science and Technology (KIST), Seoul 02792, Republic of Korea*

*3 R&D Center, Maccon IT Inc., Bucheon 14441, Republic of Korea*

*4 Department of Chemical Engineering, Ajou University, Suwon 16499, Republic of Korea*

*5 Department of Nano Applied Engineering, Kangwon National University, Chuncheon 24341, Republic of Korea*

Correspondence should be addressed to Kyu Hyoung Lee; khlee2014@kangwon.ac.kr


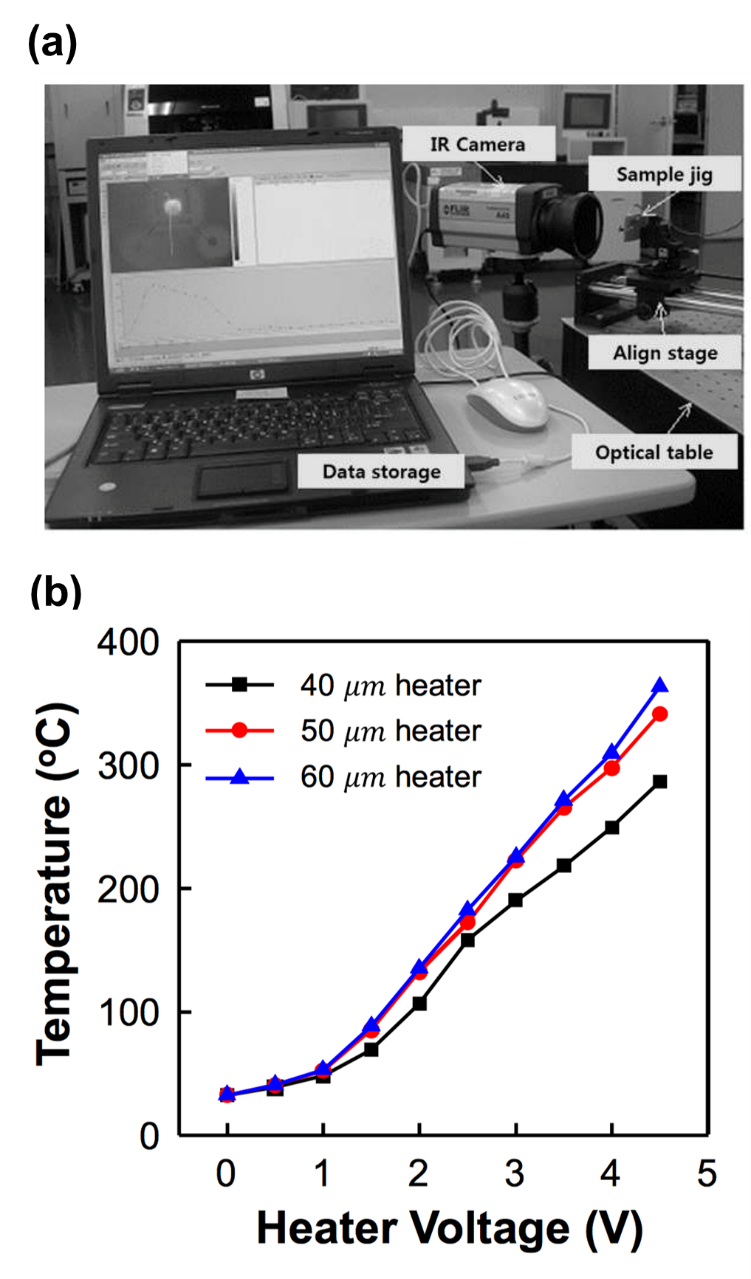


Figure S1. (a) IR measurement set-up and (b) measured temperature by IR camera as function of applied voltage. From three different heater widths data, we used 60 µm width pattern for MEMS H2 sensor.


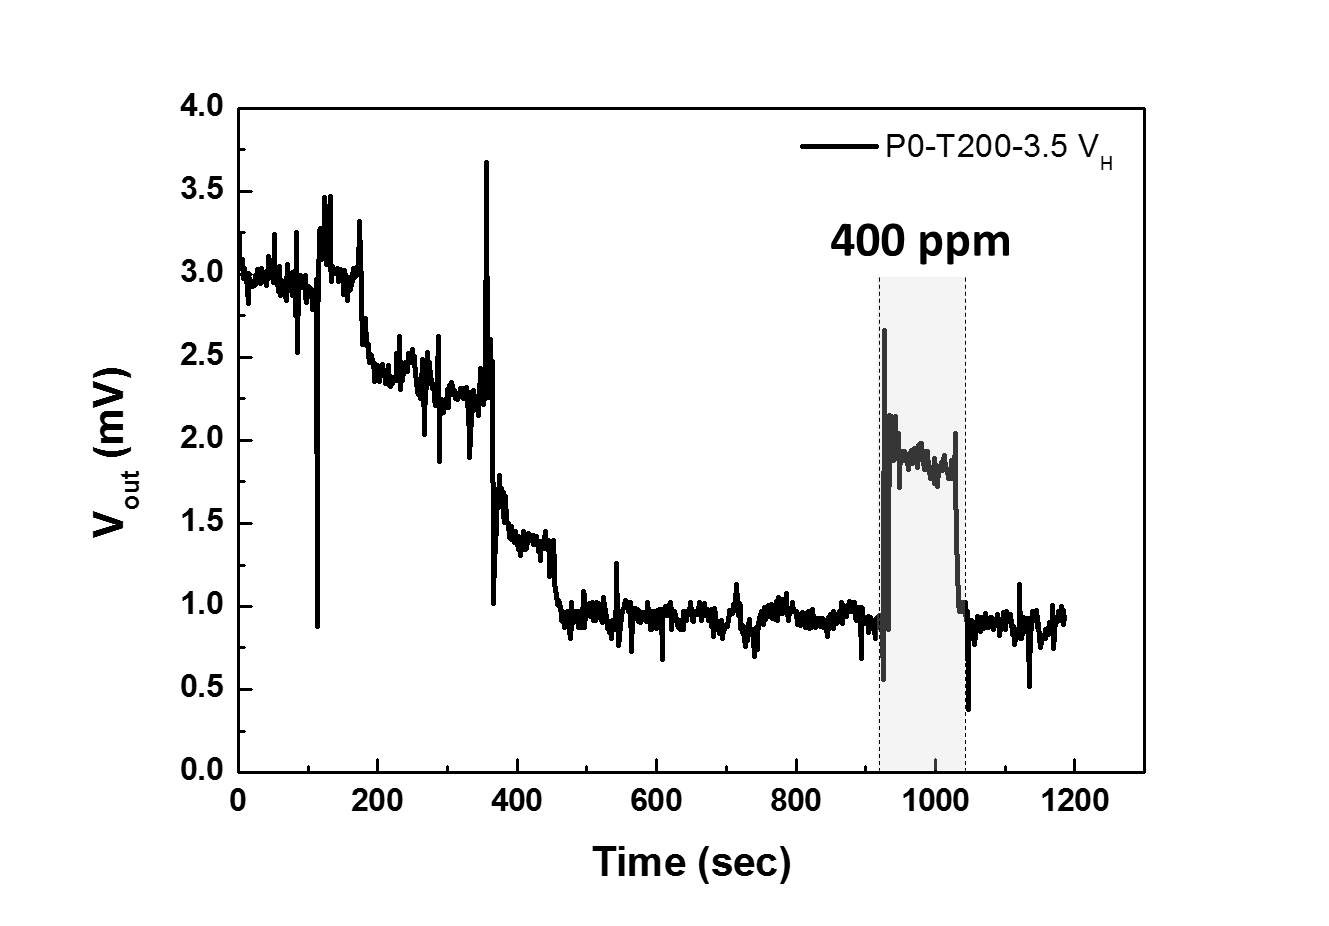
Figure S2. Hydrogen gas detection without PdO layer. The hydrogen sensing had 3.5 V applied.
